# Supplementary material for: The impact of an Implementation Strategy Bundle on the adoption of a combined lifestyle intervention in multiple community care settings: A hybrid type III stepped wedge implementation effectiveness trial
Source: Research Square preprint supplement (doi:10.21203/rs.3.rs-8057231/v1), 2025-12-08
Supplement: Supplementary file 1 [file 3751b2453a327dfdb10c00a7.docx]

The impact of an Implementation Strategy Bundle on the adoption of a combined lifestyle intervention in multiple community care settings: A hybrid type III stepped wedge implementation effectiveness trial

**Patricia J van der Laag*1, Berber G Dorhout2,3, Nicolaas PA Zuithoff1, Cindy Veenhof2,4,5, Di-Janne JA Barten2,4, Lisette Schoonhoven1,6**

Additional file 1. description of implementation strategies following Proctor recommendation for specifying and reporting implementation strategies.

| Theme | Name of the strategy | CFIR domain – construct affected | Definition of the strategy | Actors | Action | Targets | Temporality | Dose | Implementation outcome affected | Justification  *Empirical evidence, Theory based evidence, Pragmatic justification* |
| --- | --- | --- | --- | --- | --- | --- | --- | --- | --- | --- |
| Assessing the context | Conduct local needs assessment | Inner setting - readiness for implementation | Collect and analyze data related to the need for the innovation; this assessment could be focused on the description of usual care and its distance from evidence-based care, outcomes of usual care, opinions from stakeholders on the needs for an innovation, or on special considerations for delivering the innovation in the local context. | RG | Researchers develop a readiness tool to assess the different contexts of professionals, to assess if all required materials are available | Identifying the needs of physical therapists and dieticians implementing ProMuscle | Before the start of the implementation | One questionnaire before the start of the implementation. Completing the questionnaire takes up to approximal 10 min. | Acceptability Appriopriateness | Theory based (Chamberlain et al., 2008) |
| Assess for readiness and identify barriers and facilitator | Inner setting - implementation climate  Inner setting - readiness for implementation | Assess various aspects of an organization to determine its degree of readiness to implement, barriers that may impede implementation, and strengths that can be used in the implementation effort. | RG | Assessment of barriers and facilitators through literature and consultation with stakeholders. Develop readiness tool based on the previous identified barriers and facilitators. Asses readinesstool with HCPs | Identifying barriers and facilitators of physical therapists and dieticians for implementation of ProMuscle | Before the start of the implementation | One questionnaire before the start of the implementation of approx. 10 min. | Appriopriateness  Feasibility | Empirical(*Effective Practice and Organisation of Care (EPOC). EPOC Taxonomy; 2015*, n.d.; Rugs et al., 2011)  Theory-based (Klein & Sorra, 1996) |
| [Conduct local needs assessment](file:///C:/Users/local_plaag3/INetCache/Content.MSO/9AED9CEB.xlsx#'patient needs and recources'!C2) | Outer setting - patient needs and recourses | Collect and analyze data related to the need for the innovation | HCP | Assessment of needs of recipients of the intervention to align with the knowledge and needs in the first week of the intervention | Identify need of possible recipients of ProMuscle | Before the start of the intervention | During the intake of the intervention | Fidelity  Patient Centeredness | Pragmatic from experiences of HCP |
| Costs | Acces new funding | Intervention characteristics - costs | Access new or existing money to facilitate the implementation | HCP | Writing calls or grant applications to co-finance the intervention | Possible funders of the intervention are healthcare insurances, municipalities, funds etc.  Co-funding gives an opportunity to lower the costs of the intervention for recipients | Ideally before start of the implementation, but can also be conducted throughout the implementation | Depending on the temporality of the funding. New funding can be assessed as many times as needed. | Feasibllity, Adoption  Fidelity  Acceptability | Pragmatic from experiences of HCP  Theoretical (Dopp et al., 2020) |
| Alter incentive/allowance | Intervention characteristics – costs  Inner setting - implementation climate | Work to incent the adoption and implementation of the clinical innovation. | RG  HCP | Researchers will inform HCPs about the implementation and the intervention. Hcps will discuss with their manager for extra time to set up and roll out the implementation | Improving knowledge of HCPs about the need for facilities during implementation. And increase the opportunity from implementing, facilitated by managers of HCPs. | Before the start of the implementation. And during if nessecary | A 30-minute phonecall/online meeting between researcher and HCPs. During implementation monthly evaluation meetings. Hcps will discuss (once) the opportunity for extra time with their managers before start of the implementation. | Feasibility  Fidelity  Adoption | Theory-based (Dopp et al., 2020; Sarkies et al., 2017) |
| Develop resource sharing agreements | Intervention characteristics - costs | Develop partnerships with organizations that have resources needed to implement the innovation | HCP | Hcps reach out to each other to share information, knowledge and materials | Improving knowledge and facilities of HCPs implementing ProMuscle | Before, during and after the implementation | Hcps contact each other is necessary, before during or after the implementation. | Feasibility  Fidelity  Sustainability | Pragmatic from HCP |
| Network internally | Build a coalition | Inner setting - readiness for implementation | Recruit and cultivate relationships with partners in the implementation effort | HCP | Assessing and analyzing of appropriate and necessary colleagues for the implementation. Start network or join existing network within the organization to inform and collaborate about the implementation of ProMuscle | Involving HCPs and stakeholders within the organization for the implementation of ProMuscle | Before, during and after the implementation | Assessing and analyzing stakeholders before the implementation. Participate in networks and informing colleagues frequently (once a month depending on the original organization structure) continued. | Adoption, Sustainability | Empirical (Sarkies et al., 2017)  Theory-based (Rogers, 2003) |
| Organize clinician implementation team meetings | Inner setting - network and communication | Develop and support teams of clinicians who are implementing the innovation and give them protected time to reflect on the implementation effort, share lessons learned, and support one another’s learning | RG  CH (HCP) | Set up a project-team consisting of colleagues involved in the intervention. Conduct monthly meetings, containing evaluation moments concerning the implementation of ProMuscle | Involving HCPs with the implementation and increase knowledge about the implementation and intervention. | Before, during and after the implementation | Set up of a project-team before the implementation, monthly meetings during the implementation and maintained after the implementation | Adoption | Theory-based (Scott, n.d.) |
| [Promote network weaving](file:///C:/Users/local_plaag3/INetCache/Content.MSO/9AED9CEB.xlsx#'network and communication '!A3) | Inner setting - network and communication | Identify and build on existing high-quality working relationships and networks within and outside the organization, organizational units, teams, etc. To promote information sharing, collaborative problem-solving, and a shared vision/goal related to implementing the innovation | CH | Analyzing if networks regarding older adults in community care already exists within the organization. Join, and if necessary, let other parties join the network who are considered important for the implementation of ProMuscle. Stimulate participants of the network to collaborate and share recourses and information about the intervention | Involving HCPs with the implementation and increase knowledge about the implementation and intervention. | Before, during and after the implementation | Analyze current networks before the implementation, join networks during the implementation, maintain the involvement after the implementation | Adoption, Sustainability | Theory-based (Liu et al., 2017) |
| Network externally | [Promote network weaving](file:///C:/Users/local_plaag3/INetCache/Content.MSO/9AED9CEB.xlsx#cosmopolitanism!A4) | Outer setting - cosmopolitanism | Identify and build on existing high-quality working relationships and networks within and outside the organization, organizational units, teams, etc. To promote information sharing, collaborative problem-solving, and a shared vision/goal related to implementing the innovation | CH  HCP | Analyzing what networks regarding older adults in community care already exists. Join and if necessary, let other parties join the network who are considered important for the implementation of the intervention. Stimulate participants of the network to collaborate and share recourses and information about the intervention | Involving relevant stakeholders with the implementation of ProMuscle. Engage stakeholders by providing information about the intervention during meetings | Before, during and after the implementation | Analyze current networks before the implementation, join networks during the implementation, maintain the involvement after the implementation | Adoption Sustainability | Theory-based (Liu et al., 2017) |
| Develop academic partnerships | Outer setting - cosmopolitanism | Partner with a university or academic unit for the purposes of shared training and bringing research skills to an implementation project | CH  HCP | Contact research institutes like universities. Involve the institutes with the implementation. Explore if there are possibilities to be supported by the institute during the implementation | Involve and engage researchers from research institutes. Creating recourse facilities for the implementation | Before, during and after the implementation | Contact institutes before implementation, remain contact and share recourses/collaborate during and after the implementation | Acceptability Adoption | Pragmatic (Waltz et al., 2015) |
| Build a coalition | Outer setting - cosmopolitanism | Recruit and cultivate relationships with partners in the implementation effort | CH  HCP | Assessing and analyzing appropriate and necessary stakeholders from external institutions for the implementation. Start network or join existing network to inform and collaborate about the implementation of ProMuscle | Involving relevant external stakeholders (e.g. General practitioners, community workers, policy officers) with the implementation of ProMuscle. Engage stakeholders by providing information about the intervention during meetings | Before, during and after the implementation | Assessing and analyzing stakeholders before the implementation. Participate in networks and informing stakeholders frequently depending on agreements about contact | Adoption Sustainability | Theory-based (Scott, n.d.) |
| Knowledge | Develop educational materials | Characteristics of individuals - knowledge and beliefs about the intervention  Intervention characteristics - design quality and packaging | Develop and format manuals, toolkits, and other supporting materials in ways that make it easier for stakeholders to learn about the innovation and for clinicians to learn how to deliver the clinical innovation | CH  HCP | Researchers develop educational material, and courses for HCPs. Hcps prepare materials to inform recipients and stakeholders about the intervention (flyers, presentations etc). | Improving opportunities and capabilities HCPs executing the intervention, stakeholders, and recipients of ProMuscle | Before, during and after the implementation | Develop educational materials for the HCPs, before the implementation. Hcps further develop materials during the implementation | Acceptability  Adoption  Feasibility  Fidelity | Theory-based  (Hempel et al., 2019; Michie et al., 2008) Pragmatic from needs of HCPs |
| Conduct ongoing training | Characteristics of individuals - other personal attributes | Plan for and conduct training in the clinical innovation in an ongoing way | RG  IO | One year after the first ProMuscle course, organize a follow up meeting to get back on the course, content and background information of ProMuscle | Improving and maintaining knowledge, skills, and capabilities of HCPs delivering ProMuscle. | Before, during and after the implementation | Before the first HCPs start deliver the intervention, they follow the ProMuscle course. During the implementation meetings are held to keep HCP involved. Every one year after the implementation HCP follow a follow-up course. | Acceptability Adoption | Empirical (Grimshaw et al., 2004)  Theory-based (Kok et al., 2016; Michie et al., 2008) |
| Conduct educational meetings | Characteristics of individuals - knowledge and beliefs about the intervention | Hold meetings targeted toward different stakeholder groups to teach them about the clinical innovation | RG  IO | Assessing involved stakeholders, continued intervention meetings to inform stakeholders about the implementation of the intervention. | Engaging stakeholders (e.g. Hcps, general practitioners, community workers, policy officers) by involving and informing about the intervention. | Before, during and after the implementation | Before the implementation set up of a network of involved stakeholders. During and after the implementation continued meeting with the network | Acceptability Sustainment | Empirical (Forsetlund et al., 2021; Sarkies et al., 2017)  Theory-based (Kok et al., 2016)  Pragmatic |
| Champions | [Identify and prepare champions](file:///C:/Users/local_plaag3/INetCache/Content.MSO/9AED9CEB.xlsx#'knowledge and beliefs about the'!A4) | Characteristics of individuals - knowledge and beliefs about the intervention  Inner setting - implementation climate | Identify and prepare individuals who dedicate themselves to supporting, marketing, and driving through an implementation, overcoming indifference or resistance that the intervention may provoke in an organization | RG & HCP | Within every healthcare practice willing to implement ProMuscle a champion will be identified. The researchers will provide information about the tasks of a champion through an online guide | To make sure that within an organization at least one healthcare professional act as a champion to facilitate the adoption of ProMuscle | Before the implementation | Before the implementation organizations can point out a champion. The champions are informed about their tasks by the research team. | Adoption  Fidelity | Pragmatic from needs of HCPs and experience of implementation experts |
| Patient need and recourses | Involve patients consumers and family members | Process - engaging innovation participants  Outer setting - patient needs and recourses | Engage or include patients/consumers and families in all phases of the implementation effort, including training in the clinical innovation, and advocacy related to the innovation effort. | HCP | Recipients will be interviewed to inform possible barriers and facilitators to participate in ProMuscle. Hcps will inform recipients about the progress during the meetings, stimulate group adherence during the intervention. | Make sure that the intervention aligns to the needs of the recipients of ProMuscle | Before the implementation and during the intervention | Before the implementation barriers and facilitators will be identified. During the intervention recipients will be informed and stimulated | Acceptability | Theory-based (Grol et al., n.d.)  Pragmatic from experiences of HCPs and needs of recipients of ProMuscle |
| Prepare patients/ consumers to be active participants | Process - engaging innovation participants  Outer setting - patient needs and recourses | Prepare patients/consumers to be active in their care, to ask questions, and specifically to inquire about care guidelines, the evidence behind clinical decisions, or about available evidence-supported treatments. | HCP | Hcp will motivate recipients during the intervention with motivational interviewing, goals setting, participation and/or shifting focus | Make sure that recipients participate and remains motivated during ProMuscle | During the intervention | In every consult/training during the intervention | Fidelity | Theory-based (Bartholomew et al., 2016; Kok et al., 2016)  Pragmatic evidence from experience of HCPs and needs of recipients. |
| Intervene with patients and consumers to enhance uptake and adherence | Process - engaging innovation participants  Outer setting - patient needs and recourses | Intervene with patients/consumers to increase uptake of and adherence to clinical treatments. This includes consumer/patient reminders and financial incentives to attend appointments. | HCP | Sending reminders and extra information to recipients through email/phone and motivational conversations during the intervention. | Recipients of ProMuscle | During the intervention | In every consult/training, motivational talks will be held. Before every appointment a reminder of the appointment will be sent. Once/twice a week extra information will be sent per email. Information will be sent after completion of the program, end date is advised to be after at least 1 year | Fidelity | Empirical (Grimshaw et al., 2004)  Pragmatic from experiences of HCPs |
| [Promote adaptability](file:///C:/Users/local_plaag3/INetCache/Content.MSO/9AED9CEB.xlsx#'patient needs and recources'!C12) | Outer setting - patient needs and recourses  Intervention characteristics - design quality and packaging | Identify the ways a clinical innovation can be tailored to meet local needs and clarify which elements of the innovation must be maintained to preserve fidelity | RG  IO  HCP | Assess the adaptability of ProMuscle; investigate which elements can be adjusted and which elements should maintain. Measure patient outcomes and collect adaptions during the implementation. Tailoring the intervention to patient needs. | Make sure HCPs are able to match the intervention to characteristics of recipients without losing the working elements of the intervention | Before, during and after the implementation | Before implementation ProMuscle will be discussed with HCPs, to assess which elements they can deliver and what elements are evident. Literature will be gathered about the working elements. | Fidelity  Appriopriateness | Theory-based (Kok et al., 2016)  Pragmatic from experience of HCPs and researchers. |
| Obtain and use patients/consumers and family feedback | Outer setting - patient needs and recourses | Develop strategies to increase patient/consumer and family feedback on the implementation effort | RG  HCP | Assessment of effective ways to engage recipients of ProMuscle during interviews with older adults. Hcp give recipients possibilities to give feedback about the intervention and implementation | Make sure that the recruitment and the intervention align with the needs of recipients | Before implementation and during intervention | Before implementation researchers will interview older adults to assess effective ways to engage possible recipients of ProMuscle and share this with HCPs. During the intervention HCP will ask recipients for feedback about the implementation process during the training/consultation, and if necessary adapt the intervention to their needs. | Implementation | Pragmatic |
| RG = research group; HCP = healthcare professional; CH = champion; IO = intervention owner | | | | | | | | | | |
