# Supplementary material for: The impact of an Implementation Strategy Bundle on the adoption of a combined lifestyle intervention in multiple community care settings: A hybrid type III stepped wedge implementation effectiveness trial
Source: Research Square preprint supplement (doi:10.21203/rs.3.rs-8057231/v1), 2025-12-08
Supplement: Supplementary file 2 [file 411c9b198101c8308359b77d.docx]

The impact of an Implementation Strategy Bundle on the adoption of a combined lifestyle intervention in multiple community care settings: A hybrid type III stepped wedge implementation effectiveness trial

**Patricia J van der Laag*1, Berber G Dorhout2,3, Nicolaas PA Zuithoff1, Cindy Veenhof2,4,5, Di-Janne JA Barten2,4, Lisette Schoonhoven1,6**

# **Additional file 2.** Readiness Assessment – English Translation

Scale: 1 – Strongly Disagree to 5 – Strongly Agree

## **Implementation Context – Needs of Older Adults**

- 1. I have work experience with the ProMuscle target group (adults aged 65+)
  2. I know what might prevent 65+ adults from participating in ProMuscle
  3. The way ProMuscle is offered in my organization aligns with the expectations and needs of 65+ adults
  4. I am capable of motivating 65+ adults to complete the ProMuscle program and maintain a healthy lifestyle
  5. I am aware of what is going on in my neighborhood and what older adults need in terms of prevention

## **Implementation Context – Internal Factors**

2.1. In my organization, there are regular team meetings about practice-related matters

- 1. In my organization, employees collaborate well
  2. I know which colleagues I need in order to successfully implement ProMuscle in my organization
  3. I have a good working relationship with my supervisor
  4. Employees are empowered in my organization
  5. There is a positive work climate in my organization that supports successful implementation of ProMuscle
  6. I expect that colleagues in my organization will be fully committed to successfully implementing ProMuscle
  7. I believe that my colleagues recognize the added value of ProMuscle
  8. I trust that management in my organization can support successful implementation of ProMuscle
  9. My organization is open to ideas from employees
  10. My organization allows room for the development of new interventions
  11. Managers in my organization are actively involved in implementing new interventions
  12. My organization has sufficient resources (space, time, equipment) to offer ProMuscle
  13. My organization offers me opportunities to develop myself regarding new interventions like ProMuscle

## **Implementation** **Context – Characteristics of the Professional**

- 1. I am capable of quickly acquiring new knowledge and applying it in practice
  2. As a healthcare professional, I have the appropriate knowledge and/or skills to deliver ProMuscle
  3. I am familiar with the principles of protein-rich nutrition in combination with strength training (such as the ProMuscle intervention)

## **Implementation Context – Characteristics of the Intervention**

4.1 ProMuscle seems better than comparable existing interventions for older adults that I currently offer or could offer in my organization

- 1. The working method of ProMuscle aligns with how we work in our organization
  2. I know the costs of implementing ProMuscle
  3. I know the costs for participants of ProMuscle
  4. I am aware of different ways to finance ProMuscle

## **Implementation Context – Process**

1. My organization is able to reach 65+ adults in the neighborhood

## **Implementation Context – Collaborations**

6.1 My organization has the necessary relationships with relevant organizations involved in elderly care

6.2 My organization encourages me to network with colleagues outside my own organization

6.3 I am well informed about the various (healthcare) organizations located near my organization

6.4 In my organization, we are aware of regional and national policies regarding (preventive) elderly care
